# Supplementary material for: Layered double hydroxide–polyphosphazene-based ionomer hybrid membranes with electric field-aligned domains for hydroxide transport
Source: Royal Society of Chemistry journal article supplement (doi:10.1039/c4ta00686k), 2014-01-01
Supplement: c4ta00686k1.pdf [file c4ta00686k1.pdf]

**Layered double hydroxide / polyphosphazenes-based ionomer hybrid  
membranes with electric field-aligned domains for hydroxide transport**

Jiantao Fan, Hong Zhu,\* Rui Li, Nanjun Chen, Kefei Han

State Key Laboratory of Chemical Resource Engineering, Institute of Modern  
Catalysis, Department of Organic Chemistry, Beijing University of Chemical  
Technology, Beijing 100029, P. R. China.

Fax: +86-10-6444-4919

E-mail: [zhuho128@126.com](mailto:zhuho128@126.com)

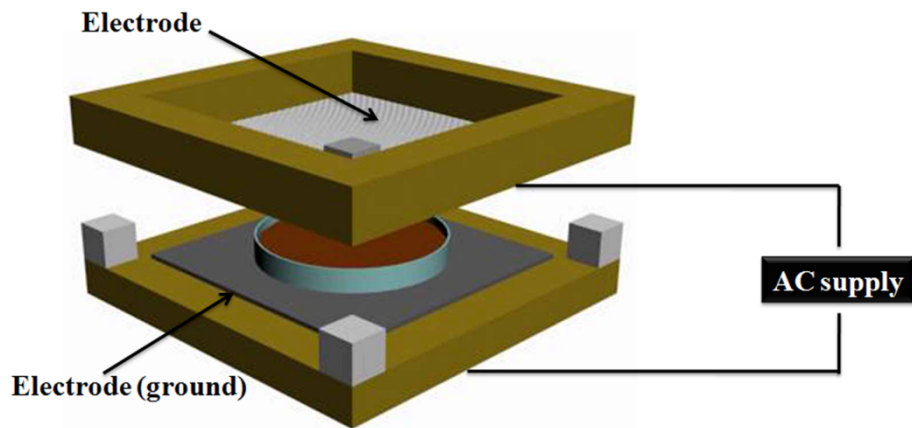

Fig. S1 – Experimental setup for electro-casting process, the top electrode was made from stainless steel mesh to allow solvent vapor to escape.

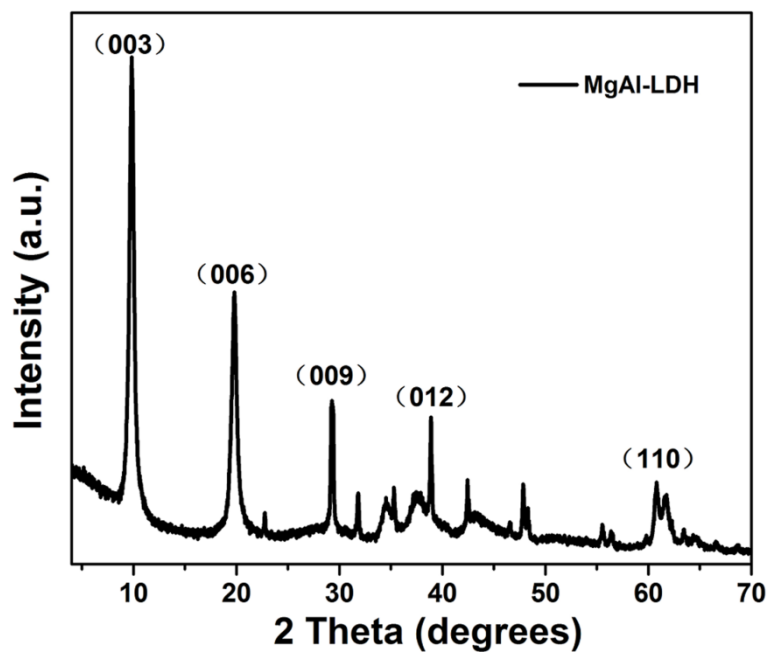

Fig. S2 – XRD pattern of the MgAl-LDH powdered sample.

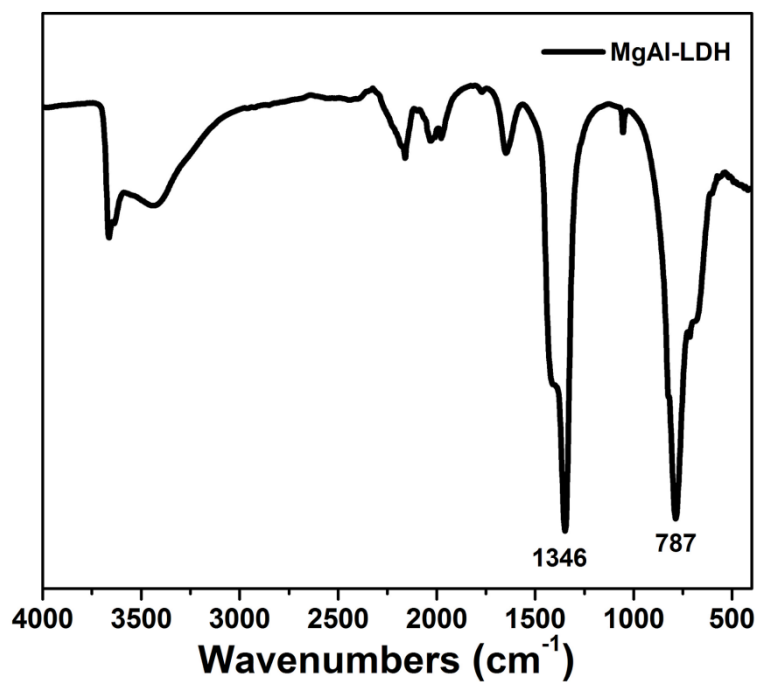

Fig. S3 – FTIR spectrum of the MgAl-LDH powdered sample.

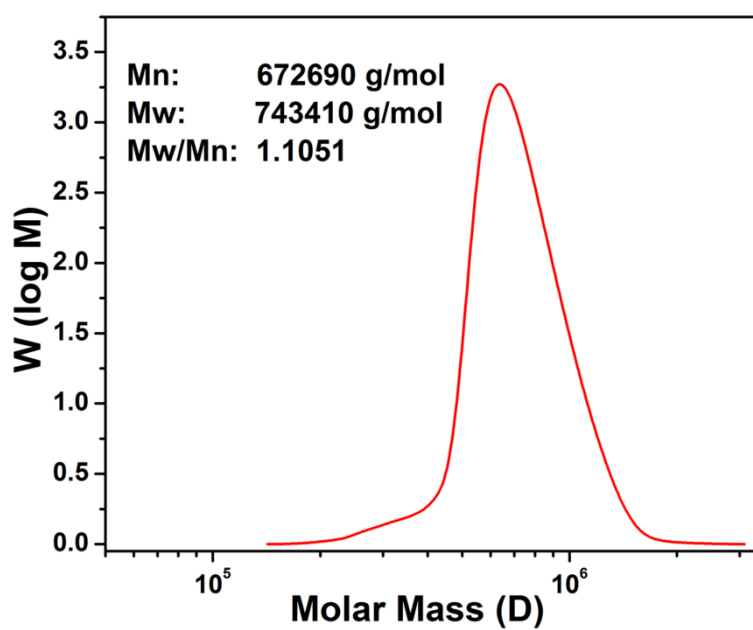

Fig. S4 – GPC curves of PMPP.

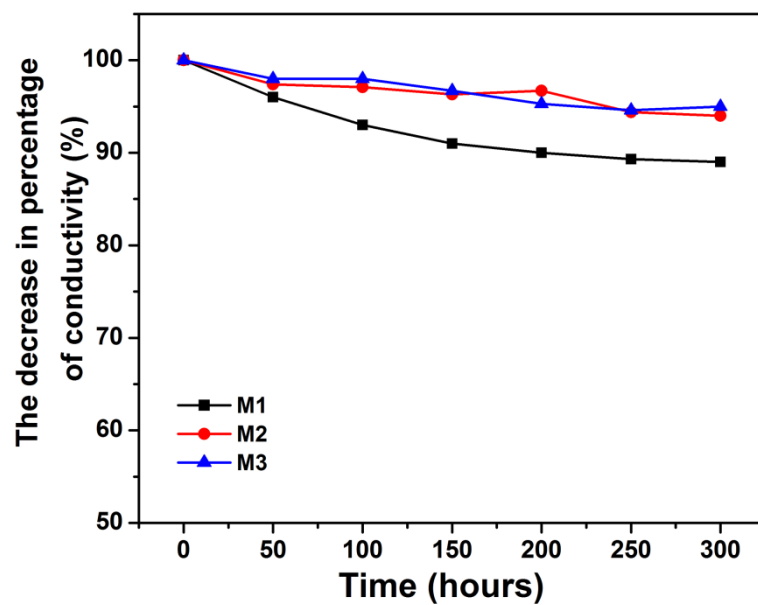

**Fig. S5 – Stability of ionic conductivity of membranes after having been immersed in 1 molL<sup>-1</sup> NaOH solution at 60 °C.**
